# Supplementary material for: Infection and the microbiome in bronchiectasis
Source: PubMed Central journal article supplement — Eur Respir Rev. 2024 Jul 3;33(173):240038. doi: 10.1183/16000617.0038-2024 (PMC11220623; doi:10.1183/16000617.0038-2024), 2024-07-03
Supplement: ERR-0038-2024.SUPPLEMENT.pdf [file ERR-0038-2024.SUPPLEMENT.pdf]

**Online data supplement**

**Infection and the microbiome in bronchiectasis**

**Authors:** Micheal Mac Aogáin, Alison J. Dicker, Pontus Mertsch, Sanjay H. Chotirmall<sup>#</sup>

**#Corresponding author:** Sanjay H. Chotirmall, MD PhD, Lee Kong Chian School of Medicine, Nanyang Technological University, 11 Mandalay Road, Singapore 308232. E-mail: [schotirmall@ntu.edu.sg](mailto:schotirmall@ntu.edu.sg)

Appendix 1: Source of information included in Figure 2B

| Year | Method  | Patients (n) | Author          | Pubmed ID (PMID) |
|------|---------|--------------|-----------------|------------------|
| 2000 | culture | 150          | Pasteur         | PMID: 11029331   |
| 2001 | culture | 75           | Angrill         | PMID: 11809984   |
| 2002 | culture | 50           | Palwatwichai    | PMID: 11896903   |
| 2002 | culture | 70           | Hernandez       | PMID: 11841770   |
| 2003 | culture | 100          | Kelly           | PMID: 14962701   |
| 2007 | culture | 89           | King            | PMID: 17467966   |
| 2009 | culture | 91           | Loebinger       | PMID: 19357155   |
| 2010 | culture | 143          | MacFarlane      | PMID: NOPMID*    |
| 2013 | 16S     | 40           | Tunney          | PMID: 23348972   |
| 2014 | culture | 608          | Chalmers        | PMID: 24328736   |
| 2014 | culture | 218          | Chalmers        | PMID: 22016379   |
| 2014 | culture | 253          | Geominne        | PMID: 22423975   |
| 2014 | culture | 105          | Chalmers        | PMID: 24328736   |
| 2014 | culture | 126          | Chalmers        | PMID: 22016379   |
| 2014 | culture | 819          | Martinez-Garcia | PMID: 24232697   |
| 2014 | culture | 96           | Rogers          | PMID: 25458200   |
| 2014 | 16S     | 96           | Rogers          | PMID: 25458200   |
| 2015 | culture | 155          | McDonnel        | PMID: 25200914   |
| 2017 | culture | 1826         | Aksemit         | PMID: 27889361   |
| 2016 | 16S     | 76           | Cox             | PMID: 28170403   |
| 2017 | 16S     | 63           | Lee             | PMID: 30423913   |
| 2018 | ITS     | 248          | Mac Aogáin      | PMID: 29880655   |
| 2018 | culture | 2596         | Araújo          | PMID: 29386336   |
| 2018 | MG      | 63           | Taylor          | PMID: 30151191   |
| 2018 | 16S     | 29           | Woo             | PMID: 31053725   |
| 2019 | 16S     | 124          | Finch           | PMID: 31264895   |
| 2019 | culture | 2195         | Dahr            | PMID: 31402007   |
| 2019 | 16S     | 32           | Pillarisetti    | PMID: 31023855   |
| 2019 | MG      | 19           | Mac Aogáin      | PMID: 32320621   |
| 2020 | 16S     | 185          | Oriano          | PMID: 32499333   |
| 2020 | culture | 2255         | Huang           | PMID: 32070324   |
| 2020 | ITS     | 42           | Cuthbertson     | PMID: 32540174   |
| 2020 | 16S     | 40           | Li              | PMID: 32966701   |
| 2020 | culture | 104          | Eralp           | PMID: 32546272   |
| 2020 | culture | 202          | Sharif          | PMID: 32269886   |
| 2020 | 16S     | 21           | O'Neill         | PMID: 31364220   |
| 2021 | 16S     | 30           | Broderick       | PMID: 35141165   |
| 2021 | culture | 168          | Young           | PMID: 34342336   |
| 2021 | culture | 1305         | Shkeiri         | PMID: 34139580   |
| 2021 | culture | 103          | Nursoy          | PMID: 33989070   |
| 2021 | culture | 299          | McCallum        | PMID: 33964302   |
| 2021 | 16S     | 281          | Dicker          | PMID: 33961805   |
| 2021 | culture | 388          | Mehra           | PMID: 33836129   |
| 2021 | 16S/ITS | 217          | Mac Aogáin      | PMID: 33820995   |
| 2021 | culture | 1912         | Martinez-García | PMID: 32081438   |
| 2022 | culture | 148          | Fong            | PMID: 35471849   |
| 2022 | 16S     | 121          | Huang           | PMID: 35436182   |
| 2022 | 16S     | 198          | Shoemark        | PMID: 35050830   |
| 2023 | 16S     | 100          | Lu              | PMID: 38115299   |
| 2023 | 16S     | 199          | Choi            | PMID: 37769155   |
| 2023 | culture | 20           | Wagner          | PMID: 37450508   |
| 2023 | culture | 16963        | Chalmers        | PMID: 37105206   |
| 2024 | 16S     | 280          | Mac Aogáin      | PMID: 38271608   |

\*\* Published abstract: Macfarlane JG, McAlinden P, De Soyza AP240 Longitudinal study of sputum microbiology in adult non-CF bronchiectasisThorax 2010;65:A177-A178.
